# Supplementary figures and images for: Hormone use and risk for lung cancer: a pooled analysis from the International Lung Cancer Consortium (ILCCO)
Source: PubMed Central journal article supplement — Br J Cancer. 2013 Sep 3;109(7):1954–64. doi: 10.1038/bjc.2013.506 (PMC3790162; doi:10.1038/bjc.2013.506), 2013-09-03

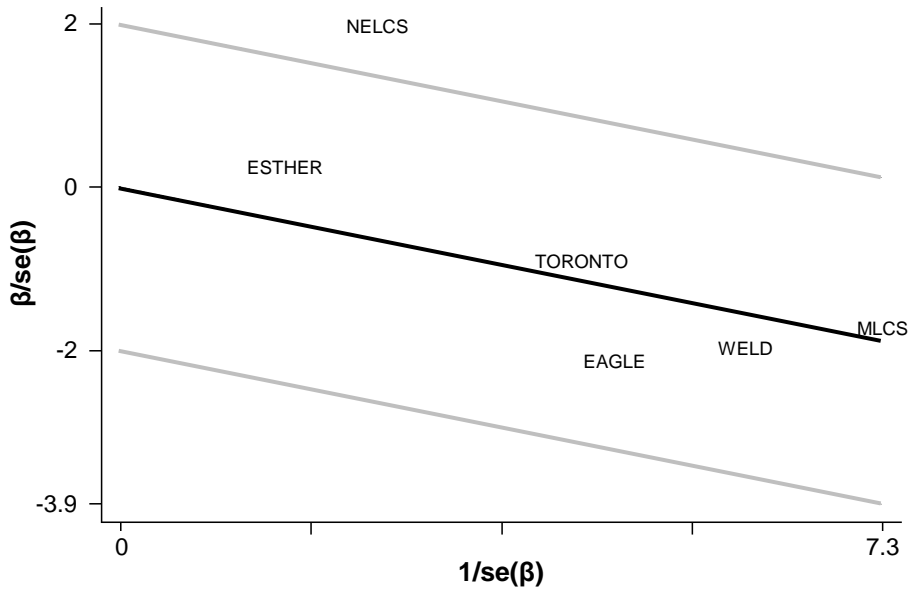

Supplement: bjc2013506x1.pdf [file bjc2013506x1.pdf]
